# Supplementary material for: Combining ionic liquids and polyethylene glycols to boost the hydrophobic–hydrophilic range of aqueous biphasic systems
Source: Royal Society of Chemistry journal article supplement (doi:10.1039/c3cp53701c), 2013-01-01
Supplement: c3cp53701c.pdf [file c3cp53701c.pdf]

## Supplementary Information

### Combining ionic liquids and polyethylene glycols to boost the hydrophobic-hydrophilic range of aqueous biphasic systems

Jorge F. B. Pereira,<sup>a</sup> Luís Paulo N. Rebelo,<sup>b</sup> Robin D. Rogers,<sup>\*c</sup> João A. P. Coutinho<sup>a</sup>  
and Mara G. Freire<sup>\*a,b</sup>

<sup>a</sup>Departamento de Química, CICECO, Universidade de Aveiro, Campus Universitário de Santiago, 3810-193 Aveiro, Portugal.

<sup>b</sup>Instituto de Tecnologia Química e Biológica, ITQB2, Universidade Nova de Lisboa (www.itqb.unl.pt), Av. República, Apartado 127, 2780-901 Oeiras, Portugal.

<sup>c</sup>Center for Green Manufacturing and Department of Chemistry, The University of Alabama, Tuscaloosa, AL 35487, USA.

\*Corresponding author

Tel: +351-234-370200; Fax: +351-234-370084;

E-mail address: rdrogers@ua.edu; maragfreire@ua.pt.

## Materials and Experimental Procedure

Chloranilic Acid (CA, > 99 wt% pure) was purchased from Merck, while Indigo Carmine (IC,  $\geq$  98 wt% pure) and Indigo Blue (IB, > 95 wt% pure) were acquired from Sigma-Aldrich. All the ILs were commercially acquired from Iolitec with purities > 98 wt %. All samples were dried for 24 h under vacuum and at a moderate temperature (323 K) before use. PEG of average molecular weight 1500 g.mol<sup>-1</sup> (PEG 1500) was supplied by Fluka and used as received. The water used was ultrapure water, double distilled and passed by a reverse osmosis system before finally treated with a Milli-Q plus 185 purification device.

The ABS combining PEG 1500 and four different ILs, namely [C<sub>2</sub>mim]Cl, [C<sub>4</sub>mim]Cl, [C<sub>4</sub>mpyr]Cl and [C<sub>4</sub>mpip]Cl, were determined by the turbidimetric titration method. A mixture point into the biphasic region, approximately 38 wt% of PEG, 52 wt% of IL and 10 wt% of water, was selected and used to evaluate the partitioning of three different dyes, Chloranilic acid (CA), Indigo Carmine (IC) and Indigo Blue (IB). In each system, a small amount of dye,  $\approx$  0.30 mg, was added to glass tubes containing the ternary compositions with a total mass of 5 g. The ABS were then allowed to equilibrate at 323 K and atmospheric pressure conditions during 3 h. After that period, the top and bottom phases were carefully separated, and the partition coefficients of each dye were evaluated. The partition coefficient is defined as the concentration of the dye in the IL-rich phase to that in the PEG-rich one. The quantification of each dye in both phases was carried out by UV-Vis spectroscopy.

## Experimental Results

**Table S1.** Binodal weight fraction data for the systems composed of PEG 1500 (1) + IL (2) + H<sub>2</sub>O (3) at 323 K.

| [C <sub>2</sub> mim]Cl |                    | [C <sub>4</sub> mim]Cl |                    | [C <sub>4</sub> mpip]Cl |                    | [C <sub>4</sub> mpyrr]Cl |                    |
|------------------------|--------------------|------------------------|--------------------|-------------------------|--------------------|--------------------------|--------------------|
| 100 w <sub>1</sub>     | 100 w <sub>2</sub> | 100 w <sub>1</sub>     | 100 w <sub>2</sub> | 100 w <sub>1</sub>      | 100 w <sub>2</sub> | 100 w <sub>1</sub>       | 100 w <sub>2</sub> |
| 9.1583                 | 58.7473            | 14.9858                | 55.6914            | 10.60                   | 56.20              | 5.23                     | 67.60              |
| 13.4287                | 48.6955            | 15.3017                | 54.5986            | 14.96                   | 50.76              | 13.96                    | 48.78              |
| 21.9476                | 41.9476            | 24.7752                | 44.0133            | 15.30                   | 48.46              | 25.28                    | 39.77              |
| 23.4840                | 40.6187            | 36.6849                | 35.2397            | 22.49                   | 41.13              | 35.44                    | 34.93              |
| 29.5908                | 35.0914            | 39.5797                | 33.6221            | 27.62                   | 35.76              | 47.89                    | 24.07              |
| 34.4612                | 34.7182            | 49.4692                | 27.3325            | 43.56                   | 26.53              | 62.66                    | 18.64              |
| 36.7184                | 32.3570            | 52.7198                | 26.4656            | 51.19                   | 21.29              | 62.66                    | 18.64              |
| 42.5423                | 26.9599            |                        |                    | 51.42                   | 21.50              |                          |                    |
| 42.9489                | 26.6317            |                        |                    | 66.03                   | 12.86              |                          |                    |
| 44.9723                | 27.1613            |                        |                    |                         |                    |                          |                    |
| 52.3509                | 21.1144            |                        |                    |                         |                    |                          |                    |
| 58.9322                | 16.9953            |                        |                    |                         |                    |                          |                    |

**Table S2.** Weight fraction compositions, partition coefficients ( $K$ ) of neutral and charged Chloranilic Acid (CA), and pH of the respective top- and bottom-rich phases, for the ABS composed of PEG 1500 + IL, PEG 1500 + Na<sub>2</sub>SO<sub>4</sub> and PEG 4000 + Dextran 40000 at 323 K and atmospheric pressure. The results represent the average of three independent experiments  $\pm$  associated standard deviation.

| <b>Ternary System</b>           | <b>PEG 1500 / (wt%)</b> | <b>IL/salt/dextran / (wt%)</b> | <b><math>K</math></b> | <b>pH<sub>Top-phase</sub></b> | <b>pH<sub>Bottom-phase</sub></b> |
|---------------------------------|-------------------------|--------------------------------|-----------------------|-------------------------------|----------------------------------|
| Acidic pH – neutral CA          |                         |                                |                       |                               |                                  |
| Na <sub>2</sub> SO <sub>4</sub> | 16.40 $\pm$ 0.05        | 22.97 $\pm$ 0.20               | 0.01 $\pm$ 0.00       | 3.85 $\pm$ 0.54               | 3.24 $\pm$ 0.74                  |
| Dextran                         | 10.03 $\pm$ 0.07        | 9.98 $\pm$ 0.01                | 0.72 $\pm$ 0.08       | 2.80 $\pm$ 0.22               | 3.00 $\pm$ 0.80                  |
| [C <sub>2</sub> mim]Cl          | 39.29 $\pm$ 1.41        | 51.91 $\pm$ 0.12               | 0.43 $\pm$ 0.10       | 3.80 $\pm$ 0.01               | 3.70 $\pm$ 0.21                  |
| [C <sub>4</sub> mim]Cl          | 38.54 $\pm$ 0.54        | 51.65 $\pm$ 0.39               | 0.82 $\pm$ 0.12       | 3.23 $\pm$ 0.82               | 3.09 $\pm$ 0.74                  |
| [C <sub>4</sub> mpip]Cl         | 38.42 $\pm$ 0.10        | 51.82 $\pm$ 0.10               | 1.85 $\pm$ 0.02       | 3.64 $\pm$ 0.31               | 4.04 $\pm$ 0.34                  |
| [C <sub>4</sub> mpyrr]Cl        | 38.54 $\pm$ 0.18        | 51.88 $\pm$ 0.08               | 2.15 $\pm$ 0.16       | 3.53 $\pm$ 0.25               | 4.17 $\pm$ 0.12                  |
| Neutral pH – charged CA         |                         |                                |                       |                               |                                  |
| [C <sub>2</sub> mim]Cl          | 40.07 $\pm$ 0.31        | 49.74 $\pm$ 0.19               | 1.75 $\pm$ 0.11       | 5.56 $\pm$ 0.21               | 5.60 $\pm$ 0.08                  |
| [C <sub>4</sub> mim]Cl          | 38.50 $\pm$ 0.31        | 51.80 $\pm$ 0.48               | 2.58 $\pm$ 0.26       | 6.21 $\pm$ 0.59               | 6.25 $\pm$ 0.47                  |
| [C <sub>4</sub> mpip]Cl         | 38.78 $\pm$ 0.73        | 51.43 $\pm$ 0.90               | 3.47 $\pm$ 0.75       | 5.92 $\pm$ 0.03               | 5.95 $\pm$ 0.18                  |
| [C <sub>4</sub> mpyrr]Cl        | 37.26 $\pm$ 1.60        | 52.98 $\pm$ 1.51               | 6.19 $\pm$ 1.36       | 5.70 $\pm$ 0.07               | 5.66 $\pm$ 0.06                  |

**Table S3.** Weight fraction compositions, partition coefficients ( $K$ ) of Indigo Blue and Indigo Carmine, and pH of the respective Top- and Bottom-rich phases, for the ABS composed of PEG 1500 + IL and PEG 1500 + Na<sub>2</sub>SO<sub>4</sub> at 323 K and atmospheric pressure. The results represent the average of three independent experiments  $\pm$  associated standard deviation.

| <b>Ternary System</b>           | <b>PEG 1500 / (wt%)</b> | <b>IL/Salt / (wt%)</b> | <b><math>K</math></b> | <b>pH<sub>Top-phase</sub></b> | <b>pH<sub>Bottom-phase</sub></b> |
|---------------------------------|-------------------------|------------------------|-----------------------|-------------------------------|----------------------------------|
| <b>Indigo Carmine</b>           |                         |                        |                       |                               |                                  |
| Na <sub>2</sub> SO <sub>4</sub> | 15.94±0.16              | 22.45±0.23             | 0.02±0.03             | 7.02±0.21                     | 6.51±0.04                        |
| [C <sub>4</sub> mim]Cl          | 38.08±0.50              | 52.18±0.83             | 6.03±4.20             | 5.50±0.06                     | 5.53±0.11                        |
| [C <sub>4</sub> mpip]Cl         | 37.83±0.86              | 53.34±0.68             | 53.74±15.41           | 5.90±0.10                     | 5.82±0.13                        |
| [C <sub>4</sub> mpyrr]Cl        | 38.27±0.14              | 52.01±0.28             | 9.87±0.98             | 7.56±0.24                     | 7.13±0.58                        |
| <b>Indigo Blue</b>              |                         |                        |                       |                               |                                  |
| Na <sub>2</sub> SO <sub>4</sub> | 15.89±0.10              | 22.60±0.21             | 0.03±0.01             | 7.42±0.10                     | 6.96±0.02                        |
| [C <sub>4</sub> mim]Cl          | 37.63±0.13              | 52.89±0.44             | 0.21±0.09             | 6.72±0.39                     | 6.75±0.45                        |
| [C <sub>4</sub> mpip]Cl         | 37.74±0.22              | 52.79±0.15             | 3.76±0.98             | 6.44±0.76                     | 6.46±0.90                        |
| [C <sub>4</sub> mpyrr]Cl        | 38.04±0.35              | 52.18±0.60             | 0.73±0.19             | 7.68±0.18                     | 7.65±0.19                        |

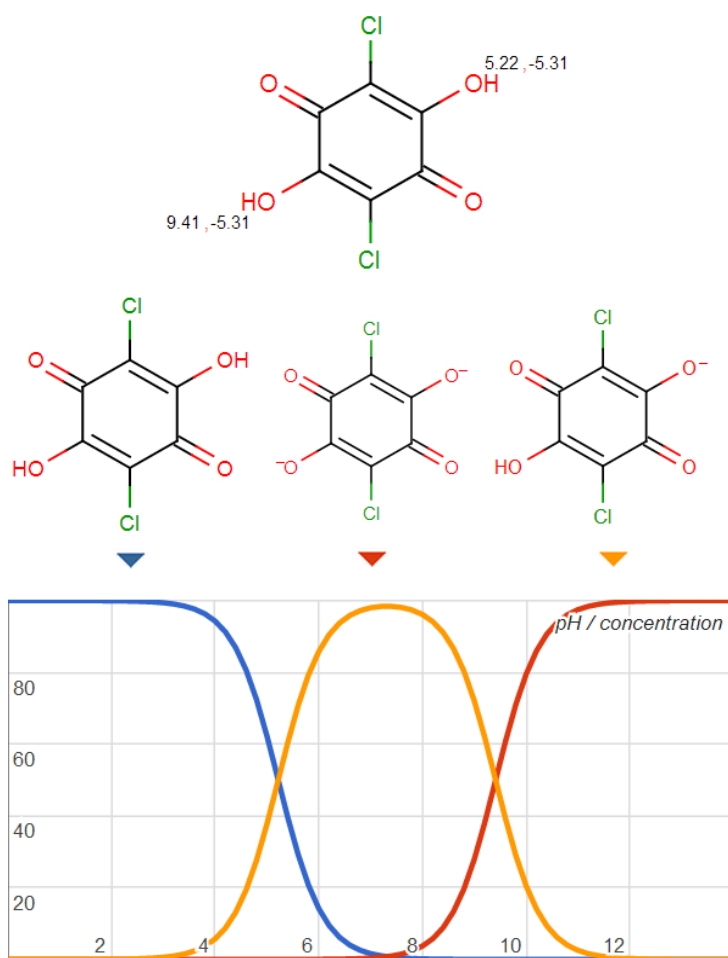

**Fig. S1.** Speciation curve of Chloranilic Acid as a function of pH. This content was adapted from the Chemspider chemical database.<sup>1</sup>

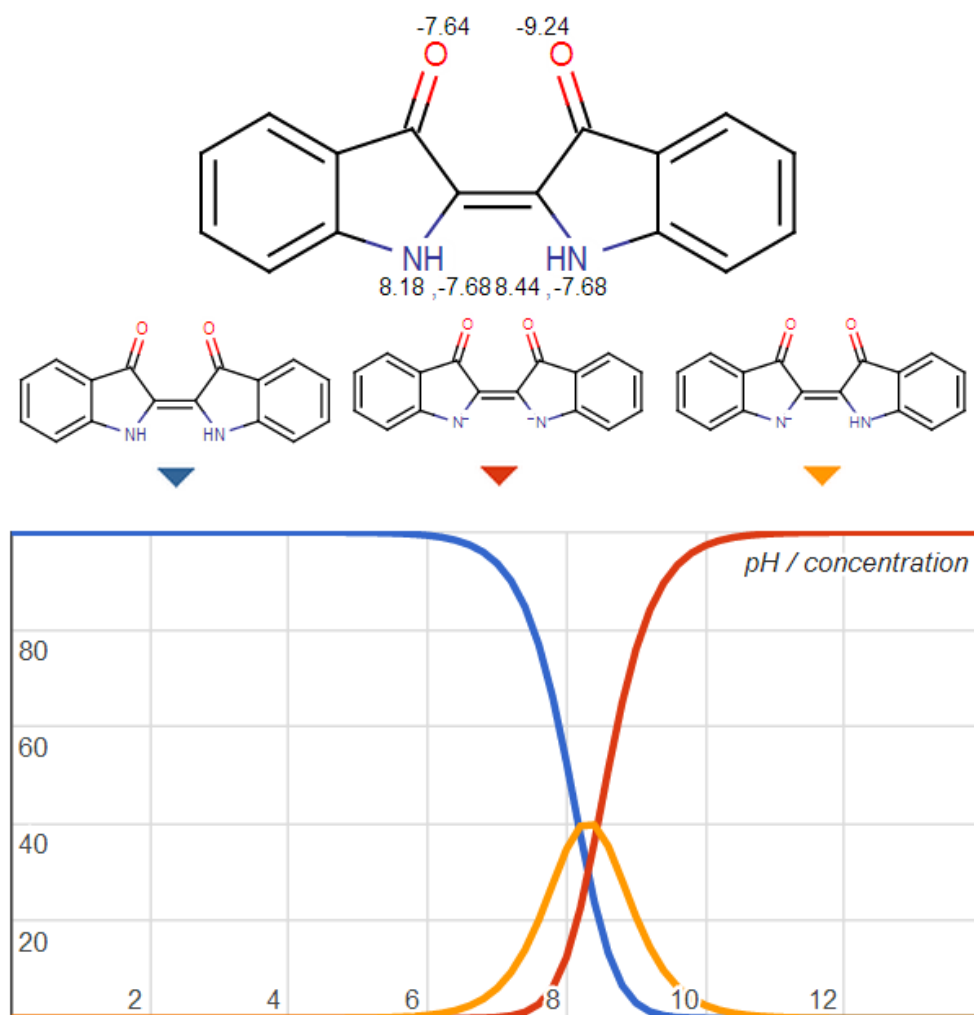

**Fig. S2.** Speciation curve of Indigo Blue as a function of pH. This content was adapted from the Chemspider chemical database.<sup>1</sup>

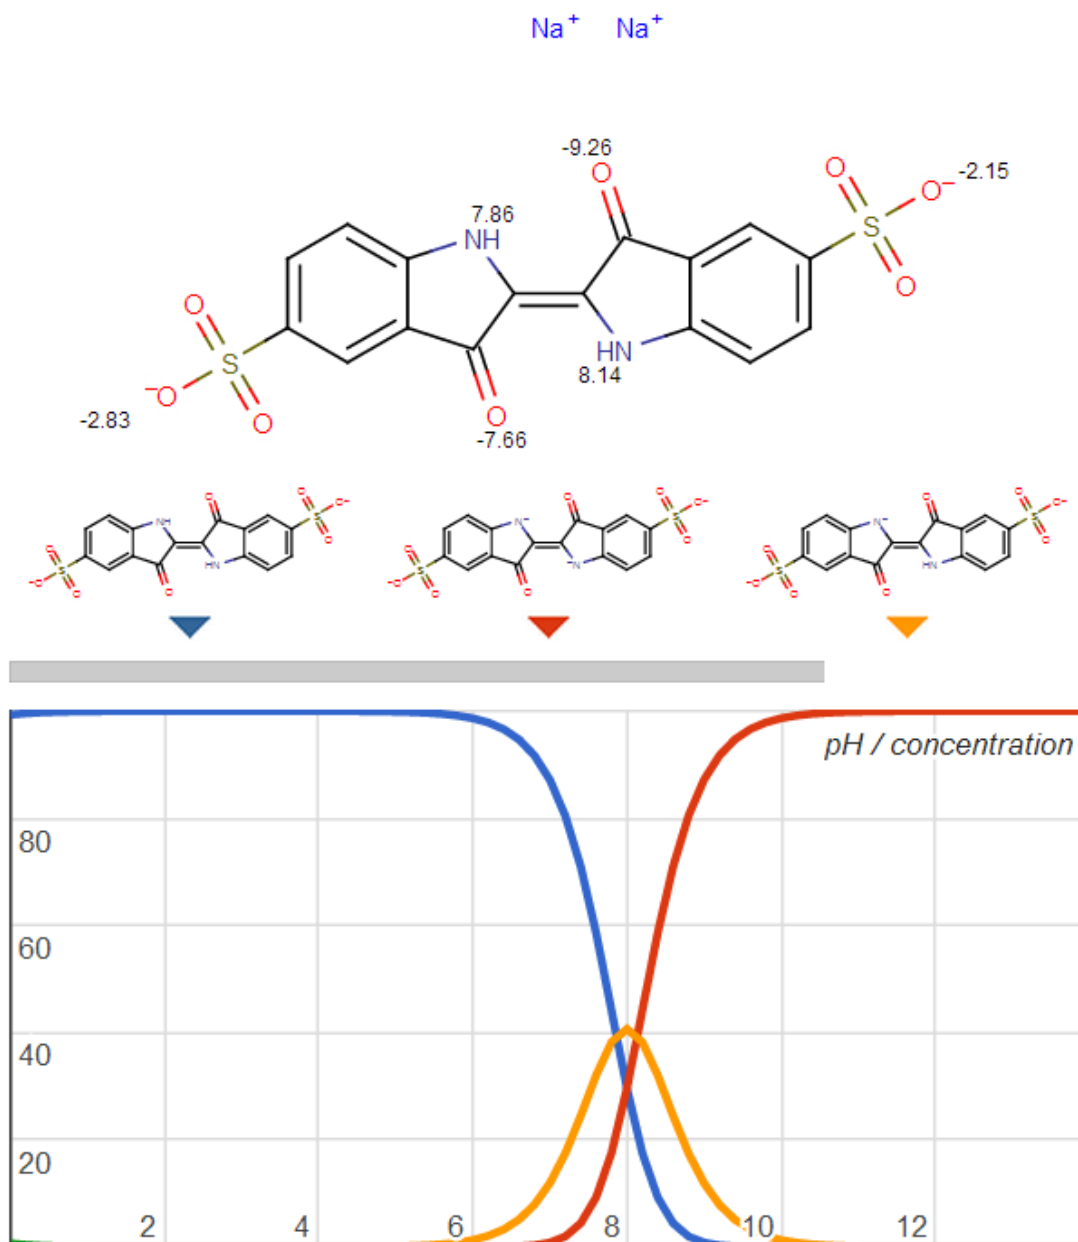

**Fig. S3.** Speciation curve of Indigo Carmine as a function of pH. This content was adapted from the Chemspider chemical database.<sup>1</sup>

## References

1. Chemspider, The free chemical database, <http://www.chemspider.com/>. Accessed at 06-05-2013.
